# Supplementary material
Source: Copernicus journal article supplement (doi:10.5194/egusphere-2026-2379)
Supplement: Supplementary file 1 [file egusphere-2026-2379-supplement.pdf]

**Supplementary material for:**

**A Hierarchical Hydrological Knowledge-guided Attention  
Network for Groundwater Depth Prediction: Insights from Multi-  
regional Model Interpretation**

Jing Xu<sup>1\*</sup>, Yuming Mo<sup>2</sup>, Senlin Zhu<sup>1</sup>, Chengji Shen<sup>3</sup>, Xinli Zhu<sup>4</sup>, Chenming  
Zhang<sup>5</sup>, Qihao Jiang<sup>6</sup>, Ling Li<sup>7</sup>

1. College of Hydraulic Science and Engineering, Yangzhou University,  
Yangzhou, China

Emails: [xujing7503@yzu.edu.cn](mailto:xujing7503@yzu.edu.cn)

[slzhu@yzu.edu.cn](mailto:slzhu@yzu.edu.cn)

2. School of Naval Architecture and Ocean Engineering, Jiangsu University  
of Science and Technology, Zhenjiang, China

Email: [yumingmo@just.edu.cn](mailto:yumingmo@just.edu.cn)

3. Ministry of Education Key Laboratory of Integrated Regulation and  
Resource Development on Shallow Lakes, Hohai University, Nanjing, China

Email: [c.shen@hhu.edu.cn](mailto:c.shen@hhu.edu.cn)

4. School of Water Conservancy, North China University of Water  
Resources and Electric Power, Zhengzhou, China

Email: [zhuxl890@126.com](mailto:zhuxl890@126.com)

5. School of Civil Engineering, The University of Queensland, Brisbane,  
Australia

Email: [chenming.zhang@uq.edu.au](mailto:chenming.zhang@uq.edu.au)

6. Jiangsu Center for Collaborative Innovation in Geographical Information  
Resource Development and Application, Nanjing Normal University, Nanjing,  
China

Email: [jiangqih@hotmail.com](mailto:jiangqih@hotmail.com)

7. Key Laboratory of Coastal Environment and Resources of Zhejiang  
Province (KLaCER), School of Engineering, Westlake University, Hangzhou,  
China

Email: [liling@westlake.edu.cn](mailto:liling@westlake.edu.cn)

\* Corresponding author: Jing Xu ([xujing7503@yzu.edu.cn](mailto:xujing7503@yzu.edu.cn))

This file contains seven tables S1-S7 and seven figures S1-S7.

**Table S1.** Percentage of land use types within 500m buffer zones for site type classification in the three study regions.

| Site code | Cropland | Forest | Grassland | Waters | Artificial surfaces | Site type    |
|-----------|----------|--------|-----------|--------|---------------------|--------------|
| YTMR      |          |        |           |        |                     |              |
| A1        | 86.0     | 0.0    | 0.0       | 0.0    | 14.0                | agricultural |
| A2        | 86.1     | 0.0    | 0.0       | 0.0    | 13.9                | agricultural |
| A3        | 64.5     | 0.0    | 0.0       | 0.0    | 35.5                | agricultural |
| A4        | 65.6     | 0.0    | 0.0       | 0.0    | 34.4                | agricultural |
| A5        | 100.0    | 0.0    | 0.0       | 0.0    | 0.0                 | agricultural |
| A6        | 69.3     | 0.0    | 0.0       | 0.0    | 30.7                | agricultural |
| A7        | 66.9     | 1.7    | 4.2       | 0.0    | 27.1                | agricultural |
| A8        | 67.6     | 0.0    | 0.0       | 0.0    | 32.4                | agricultural |
| A9        | 77.2     | 0.0    | 0.0       | 0.0    | 22.8                | agricultural |
| A10       | 85.8     | 0.0    | 0.0       | 0.0    | 14.2                | agricultural |
| A11       | 63.6     | 0.0    | 0.0       | 0.0    | 36.4                | agricultural |
| A12       | 99.3     | 0.0    | 0.0       | 0.0    | 0.7                 | agricultural |
| A13       | 78.4     | 0.0    | 0.0       | 0.0    | 21.6                | agricultural |
| A14       | 69.5     | 1.0    | 5.3       | 0.0    | 24.2                | agricultural |
| N1        | 0.1      | 0.5    | 47.3      | 0.0    | 52.1                | natural      |
| N2        | 34.9     | 0.1    | 58.3      | 0.0    | 6.6                 | natural      |
| N3        | 54.9     | 0.1    | 3.4       | 0.0    | 41.6                | natural      |
| N4        | 55.5     | 2.2    | 13.5      | 0.0    | 28.8                | natural      |
| N5        | 50.6     | 0.1    | 30.4      | 0.0    | 18.8                | natural      |
| N6        | 58.9     | 0.0    | 0.2       | 0.0    | 40.8                | natural      |
| N7        | 46.6     | 0.0    | 0.0       | 0.0    | 53.4                | natural      |
| N8        | 8.4      | 3.1    | 35.2      | 0.0    | 53.3                | natural      |
| N9        | 8.5      | 6.3    | 9.6       | 21.2   | 54.5                | natural      |
| N10       | 39.5     | 0.5    | 4.0       | 0.0    | 56.0                | natural      |
| N11       | 41.8     | 8.6    | 26.6      | 0.0    | 23.0                | natural      |
| U1        | 0.0      | 0.0    | 0.0       | 3.0    | 97.0                | urban        |
| U2        | 34.9     | 0.0    | 0.0       | 0.0    | 65.1                | urban        |
| U3        | 10.9     | 0.0    | 10.3      | 17.6   | 61.2                | urban        |
| U4        | 19.2     | 0.6    | 10.6      | 0.0    | 69.6                | urban        |
| U5        | 0.3      | 0.0    | 0.8       | 0.0    | 98.9                | urban        |
| U6        | 31.6     | 1.9    | 6.3       | 0.0    | 60.2                | urban        |
| U7        | 1.6      | 0.0    | 23.2      | 0.0    | 75.2                | urban        |
| NCP       |          |        |           |        |                     |              |
| A1        | 66.7     | 0.0    | 0.0       | 0.0    | 33.3                | agricultural |
| A2        | 78.0     | 0.0    | 0.0       | 0.0    | 22.0                | agricultural |
| A3        | 91.6     | 0.0    | 0.0       | 0.0    | 8.4                 | agricultural |

|     |       |     |     |     |      |              |
|-----|-------|-----|-----|-----|------|--------------|
| A4  | 94.8  | 1.5 | 2.3 | 1.4 | 0.0  | agricultural |
| A5  | 100.0 | 0.0 | 0.0 | 0.0 | 0.0  | agricultural |
| A6  | 82.7  | 0.0 | 0.1 | 0.0 | 17.2 | agricultural |
| A7  | 71.6  | 0.0 | 0.0 | 0.0 | 28.4 | agricultural |
| A8  | 100.0 | 0.0 | 0.0 | 0.0 | 0.0  | agricultural |
| A9  | 95.4  | 0.0 | 0.0 | 0.0 | 4.6  | agricultural |
| A10 | 100.0 | 0.0 | 0.0 | 0.0 | 0.0  | agricultural |
| A11 | 100.0 | 0.0 | 0.0 | 0.0 | 0.0  | agricultural |
| A12 | 70.4  | 0.0 | 0.0 | 0.0 | 29.6 | agricultural |
| A13 | 99.8  | 0.0 | 0.0 | 0.0 | 0.2  | agricultural |
| A14 | 65.0  | 0.0 | 0.0 | 0.0 | 35.0 | agricultural |
| A15 | 92.7  | 0.0 | 0.0 | 0.0 | 7.3  | agricultural |
| A16 | 66.7  | 0.0 | 0.0 | 0.0 | 33.3 | agricultural |
| A17 | 90.5  | 0.0 | 0.0 | 0.0 | 9.5  | agricultural |
| A18 | 100.0 | 0.0 | 0.0 | 0.0 | 0.0  | agricultural |
| A19 | 100.0 | 0.0 | 0.0 | 0.0 | 0.0  | agricultural |
| N1  | 52.3  | 0.0 | 0.0 | 0.0 | 47.7 | natural      |
| N2  | 48.7  | 0.0 | 0.0 | 0.0 | 51.3 | natural      |
| N3  | 57.3  | 0.0 | 0.0 | 0.0 | 42.7 | natural      |
| N4  | 53.4  | 0.0 | 0.0 | 0.0 | 46.6 | natural      |
| N5  | 44.4  | 0.0 | 0.0 | 0.0 | 55.6 | natural      |
| U1  | 38.2  | 0.0 | 0.0 | 0.0 | 61.8 | urban        |
| U2  | 34.9  | 0.0 | 0.0 | 0.0 | 65.1 | urban        |
| U3  | 0.5   | 0.0 | 0.0 | 0.0 | 99.5 | urban        |
| U4  | 16.4  | 0.0 | 0.0 | 0.0 | 83.6 | urban        |
| U5  | 1.3   | 0.0 | 0.0 | 0.0 | 98.7 | urban        |
| U6  | 31.5  | 0.0 | 0.0 | 0.0 | 68.5 | urban        |
| U7  | 36.7  | 0.0 | 0.0 | 0.0 | 63.3 | urban        |
| U8  | 33.0  | 0.0 | 0.0 | 0.0 | 67.0 | urban        |
| NJP |       |     |     |     |      |              |
| A1  | 60.5  | 0.0 | 0.0 | 0.0 | 39.5 | agricultural |
| A2  | 81.3  | 0.0 | 0.0 | 0.0 | 18.7 | agricultural |
| A3  | 89.5  | 0.0 | 0.0 | 0.0 | 10.5 | agricultural |
| A4  | 92.8  | 0.0 | 0.0 | 0.0 | 7.2  | agricultural |
| A5  | 65.3  | 0.0 | 0.0 | 0.0 | 34.7 | agricultural |
| A6  | 98.8  | 0.0 | 0.0 | 0.0 | 1.2  | agricultural |
| A7  | 79.8  | 0.0 | 0.0 | 0.5 | 19.7 | agricultural |
| A8  | 81.5  | 0.0 | 0.0 | 0.0 | 18.5 | agricultural |
| A9  | 94.5  | 0.0 | 0.0 | 0.0 | 5.5  | agricultural |
| A10 | 100.0 | 0.0 | 0.0 | 0.0 | 0.0  | agricultural |
| A11 | 62.4  | 0.0 | 0.0 | 3.3 | 34.3 | agricultural |
| A12 | 100.0 | 0.0 | 0.0 | 0.0 | 0.0  | agricultural |
| A13 | 73.6  | 0.0 | 0.0 | 0.0 | 26.4 | agricultural |

|     |       |     |     |      |       |              |
|-----|-------|-----|-----|------|-------|--------------|
| A14 | 76.3  | 0.0 | 0.0 | 4.9  | 18.8  | agricultural |
| A15 | 100.0 | 0.0 | 0.0 | 0.0  | 0.0   | agricultural |
| A16 | 76.3  | 0.0 | 0.0 | 0.0  | 23.7  | agricultural |
| A17 | 72.8  | 0.0 | 0.0 | 0.0  | 27.2  | agricultural |
| A18 | 71.0  | 0.0 | 0.0 | 0.0  | 29.0  | agricultural |
| A19 | 73.4  | 0.0 | 0.0 | 0.0  | 26.6  | agricultural |
| A20 | 100.0 | 0.0 | 0.0 | 0.0  | 0.0   | agricultural |
| A21 | 84.9  | 0.0 | 0.0 | 0.4  | 14.8  | agricultural |
| A22 | 77.1  | 0.0 | 0.0 | 0.0  | 22.9  | agricultural |
| A23 | 60.4  | 0.0 | 0.0 | 0.0  | 39.6  | agricultural |
| N1  | 58.8  | 0.0 | 0.0 | 0.0  | 41.2  | natural      |
| N2  | 41.8  | 0.0 | 0.0 | 0.0  | 58.2  | natural      |
| N3  | 44.4  | 0.0 | 0.0 | 0.0  | 55.6  | natural      |
| N4  | 42.2  | 0.0 | 0.0 | 1.4  | 56.4  | natural      |
| N5  | 47.8  | 0.0 | 0.0 | 0.4  | 51.8  | natural      |
| N6  | 46.1  | 0.0 | 0.6 | 0.9  | 52.4  | natural      |
| N7  | 24.7  | 0.0 | 0.1 | 30.1 | 45.1  | natural      |
| N8  | 35.1  | 0.0 | 0.0 | 5.2  | 59.8  | natural      |
| N9  | 39.7  | 0.0 | 0.0 | 19.7 | 40.6  | natural      |
| N10 | 43.5  | 0.0 | 0.0 | 0.0  | 56.5  | natural      |
| N11 | 45.0  | 0.0 | 0.0 | 8.9  | 46.1  | natural      |
| N12 | 49.3  | 0.0 | 0.0 | 0.0  | 50.7  | natural      |
| N13 | 40.8  | 0.0 | 0.6 | 36.3 | 22.3  | natural      |
| N14 | 55.1  | 0.0 | 0.0 | 0.0  | 44.9  | natural      |
| N15 | 44.5  | 0.0 | 0.0 | 0.0  | 55.5  | natural      |
| N16 | 41.9  | 0.0 | 0.0 | 2.9  | 55.2  | natural      |
| N17 | 47.8  | 0.0 | 1.2 | 49.9 | 1.1   | natural      |
| U1  | 0.0   | 0.0 | 0.0 | 0.0  | 100.0 | urban        |
| U2  | 1.3   | 0.0 | 0.0 | 0.0  | 98.7  | urban        |
| U3  | 13.1  | 0.0 | 0.0 | 0.0  | 86.9  | urban        |
| U4  | 11.6  | 0.0 | 0.0 | 0.0  | 88.4  | urban        |
| U5  | 35.7  | 0.0 | 0.0 | 0.0  | 64.3  | urban        |
| U6  | 0.0   | 0.0 | 0.0 | 0.0  | 100.0 | urban        |
| U7  | 22.1  | 0.0 | 0.0 | 8.7  | 69.3  | urban        |
| U8  | 5.4   | 0.0 | 0.0 | 0.0  | 94.6  | urban        |
| U9  | 7.1   | 0.0 | 0.0 | 0.0  | 93.0  | urban        |
| U10 | 2.4   | 0.0 | 0.0 | 0.0  | 97.7  | urban        |
| U11 | 0.5   | 0.0 | 0.0 | 0.0  | 99.5  | urban        |
| U12 | 31.3  | 0.0 | 0.0 | 0.0  | 68.7  | urban        |
| U13 | 24.5  | 0.0 | 1.5 | 0.0  | 74.0  | urban        |
| U14 | 0.0   | 0.0 | 0.0 | 0.0  | 100.0 | urban        |
| U15 | 35.6  | 0.0 | 0.0 | 0.0  | 64.4  | urban        |
| U16 | 15.9  | 0.0 | 0.0 | 0.0  | 84.2  | urban        |

|     |      |     |     |      |       |       |
|-----|------|-----|-----|------|-------|-------|
| U17 | 31.7 | 0.0 | 0.0 | 0.0  | 68.4  | urban |
| U18 | 5.2  | 0.0 | 0.0 | 0.0  | 94.9  | urban |
| U19 | 14.8 | 0.0 | 0.0 | 11.1 | 74.1  | urban |
| U20 | 9.0  | 0.0 | 0.0 | 19.4 | 71.6  | urban |
| U21 | 0.0  | 0.0 | 0.0 | 0.0  | 100.0 | urban |
| U22 | 13.8 | 0.0 | 0.0 | 0.0  | 86.2  | urban |
| U23 | 26.1 | 0.0 | 0.0 | 1.1  | 72.9  | urban |
| U24 | 2.5  | 0.0 | 0.0 | 0.0  | 97.5  | urban |

**Table S2.** Percentage of land use types within multi-scale buffer zones (1000m, 2000m, and 3000m) across the three study regions.

|                                        | NJP       | NCP       | YTMR      |
|----------------------------------------|-----------|-----------|-----------|
| Cropland in 1000m buffer (%)           | 54.1±26.3 | 65.1±23.9 | 50.2±28.4 |
| Forest in 1000m buffer (%)             | 0         | 0.4±2.3   | 2.1±3.8   |
| Grassland in 1000m buffer (%)          | 0.2±1.0   | 0.1±0.4   | 14.9±18.0 |
| Waters in 1000m buffer (%)             | 5.0±12.1  | 0.1±0.6   | 1.99±4.4  |
| Artificial surface in 1000m buffer (%) | 40.5±25.7 | 34.1±24.3 | 30.7±19.8 |
| Cropland in 2000m buffer (%)           | 61.6±21.9 | 65.2±21.6 | 54.2±31.1 |
| Forest in 2000m buffer (%)             | 0.2±1.6   | 0.4±2.4   | 3.6±5.8   |
| Grassland in 2000m buffer (%)          | 0.2±0.5   | 0.4±1.5   | 19.1±20.2 |
| Waters in 2000m buffer (%)             | 5.9±13.5  | 0.1±0.2   | 2.1±5.6   |
| Artificial surface in 2000m buffer (%) | 32.0±21.0 | 33.7±22.0 | 20.7±15.3 |
| Cropland in 3000m buffer (%)           | 64.9±20.7 | 65.5±19.4 | 54.2±30.6 |
| Forest in 3000m buffer (%)             | 0.3±2.3   | 0.8±4.8   | 4.1±6.1   |
| Grassland in 3000m buffer (%)          | 0.2±0.6   | 0.4±1.5   | 22.3±21.0 |
| Waters in 3000m buffer (%)             | 6.6±13.4  | 0.1±0.1   | 1.8±4.7   |
| Artificial surface in 3000m buffer (%) | 27.8±19.2 | 33.0±19.9 | 17.4±12.9 |

**Table S3.** Predefined encoder weights for different site types in the adaptive fusion mechanism.

| Encoder type           | Agricultural sites | Natural sites | Urban sites |
|------------------------|--------------------|---------------|-------------|
| Historical encoder     | 0.25               | 0.30          | 0.20        |
| Meteorological encoder | 0.35               | 0.40          | 0.20        |
| Geographical encoder   | 0.15               | 0.25          | 0.20        |
| Human activity encoder | 0.25               | 0.05          | 0.40        |

**Table S4.** Summary of datasets in the Lower Yangtze River Plain (LYRP).

| Site type                                                 | Agricultural    | Natural         | Urban           |
|-----------------------------------------------------------|-----------------|-----------------|-----------------|
| Record number                                             | 25564           | 12782           | 25564           |
| Site numbers                                              | 14              | 7               | 14              |
| Groundwater depth (m)                                     | 7.67±6.39       | 6.10±6.68       | 8.98±3.47       |
| Rainfall (mm/day)                                         | 3.24±8.47       | 3.25±8.34       | 3.46±9.20       |
| Average temperature (°C)                                  | 16.02±9.32      | 15.59±9.48      | 16.54±9.36      |
| Maximum temperature (°C)                                  | 19.92±9.58      | 20.15±9.69      | 20.55±9.65      |
| Minimum temperature (°C)                                  | 12.87±9.45      | 11.92±9.73      | 13.33±9.40      |
| Elevation (m)                                             | 4.50±2.32       | 2.71±2.05       | 3.71±1.44       |
| Slope (°)                                                 | 0.65±0.32       | 0.78±0.36       | 0.57±0.29       |
| Watershed numbers                                         | 2               | 3               | 3               |
| Aquifer types                                             | 2               | 1               | 1               |
| Distance to the nearest river (m)                         | 392.93±333.42   | 167.00±105.21   | 297.43±236.46   |
| Population density (capita/km <sup>2</sup> )              | 840.21±207.00   | 1056.65±186.57  | 1331.71±560.13  |
| GDP (10 <sup>8</sup> yuan)                                | 2378.19±2386.78 | 2398.74±2438.94 | 2618.81±1989.58 |
| Primary industry GDP (10 <sup>8</sup> yuan)               | 82.26±35.30     | 64.18±45.68     | 51.75±38.36     |
| Secondary industry GDP (10 <sup>8</sup> yuan)             | 1094.48±1159.93 | 1158.60±1166.22 | 1281.50±997.98  |
| Tertiary industry GDP (10 <sup>8</sup> yuan)              | 1131.53±1231.01 | 1146.42±1255.29 | 1256.64±998.89  |
| Domestic water (L/(capita·d))                             | 142.65±33.15    | 147.84±25.90    | 201.78±70.21    |
| Industrial water (m <sup>3</sup> /(10 <sup>4</sup> yuan)) | 22.23±8.50      | 17.43±10.68     | 28.65±6.83      |
| Irrigation water (m <sup>3</sup> /mu)                     | 350.58±82.06    | 422.51±89.88    | 323.14±64.77    |
| Cropland in 500m buffer (%)                               | 80.33±14.50     | 51.03±6.08      | 11.13±11.92     |
| Forest in 500m buffer (%)                                 | 0.02±0.06       | 0               | 0               |
| Grassland in 500m buffer (%)                              | 0               | 0               | 0.09±0.28       |
| Waters in 500m buffer (%)                                 | 0.45±1.12       | 4.69±6.97       | 1.78±3.69       |

---

|                                          |             |            |             |
|------------------------------------------|-------------|------------|-------------|
| Artificial surface in<br>500m buffer (%) | 19.21±14.87 | 44.28±9.16 | 87.00±12.32 |
|------------------------------------------|-------------|------------|-------------|

---

**Table S5.** Performance comparison between HHA-Net and baseline models across agricultural, natural, and urban sites in the Lower Yangtze River Plain (LYRP).

|      | Agricultural sites |              |              |                | Natural sites |              |              |                | Urban sites  |              |              |                |              |
|------|--------------------|--------------|--------------|----------------|---------------|--------------|--------------|----------------|--------------|--------------|--------------|----------------|--------------|
|      | MAPE(%)            | RMSE         | NSE          | R <sup>2</sup> | MAPE(%)       | RMSE         | NSE          | R <sup>2</sup> | MAPE(%)      | RMSE         | NSE          | R <sup>2</sup> |              |
| LYRP | GNN                | 5.003        | 0.250        | -0.230         | 0.696         | 4.190        | 0.284        | 0.407          | 0.750        | 2.455        | 0.2444       | 0.879          | 0.927        |
|      | CNN_LSTM           | 6.678        | 0.303        | -0.227         | 0.521         | 6.504        | 0.355        | -1.00          | 0.466        | 3.560        | 0.334        | 0.657          | 0.869        |
|      | MLP                | 4.962        | 0.294        | 0.231          | 0.565         | 5.404        | 0.316        | -0.261         | 0.609        | 3.802        | 0.382        | 0.806          | 0.889        |
|      | ST_GNN             | 6.235        | <b>0.226</b> | -0.491         | 0.617         | 3.716        | <b>0.163</b> | 0.267          | 0.750        | <b>1.651</b> | <b>0.157</b> | 0.913          | 0.956        |
|      | Transformer        | 17.019       | 0.599        | -6.471         | 0.501         | 14.213       | 0.624        | -4.978         | 0.526        | 4.244        | 0.364        | 0.469          | 0.887        |
|      | HHA-Net            | <b>4.923</b> | 0.232        | <b>0.330</b>   | <b>0.704</b>  | <b>3.559</b> | 0.266        | <b>0.619</b>   | <b>0.858</b> | 2.256        | 0.232        | <b>0.919</b>   | <b>0.961</b> |

**Table S6.** Results of ablation experiments at the encoder level and mechanism level.

|                     | YTMR   |         | NCP    |         | NJP    |         |
|---------------------|--------|---------|--------|---------|--------|---------|
|                     | RMSE   | Impact  | RMSE   | Impact  | RMSE   | Impact  |
| Full Model          | 0.0394 | 0       | 0.0700 | 0       | 0.0670 | 0       |
| Hist Encoder        | 0.9118 | 2213.2% | 1.1126 | 1490.2% | 1.0048 | 1398.5% |
| Met Encoder         | 0.0603 | 53.0%   | 0.1523 | 117.1%  | 0.1724 | 157.3%  |
| Geo Encoder         | 0.2685 | 581.2%  | 0.1835 | 162.3%  | 0.0750 | 11.8%   |
| Human Encoder       | 0.1418 | 259.7%  | 0.1823 | 160.4%  | 0.0914 | 36.4%   |
| Spatial Attention   | 1.0609 | 2591.3% | 0.8367 | 1095.8% | 1.0198 | 1420.9% |
| Site-type Awareness | 2.0512 | 5103.7% | 1.7744 | 2436.1% | 0.9990 | 1390.0% |
| CNN Branch          | 0.6856 | 1639.4% | 0.1383 | 97.6%   | 0.1326 | 97.7%   |
| LSTM Branch         | 0.0587 | 48.9%   | 0.5026 | 618.4%  | 0.4293 | 540.3%  |

**Table S7.** Sensitivity coefficients of spatial attention components in the adaptive spatial attention mechanism across three regions.

|                                  | YTMR  | NCP   | NJP   |
|----------------------------------|-------|-------|-------|
| Distance decay factor            | 0.311 | 0.077 | 1.107 |
| Aquifer similarity coefficient   | 0.295 | 0.333 | 0.221 |
| Site-type similarity coefficient | 0.471 | 0.743 | 0.402 |
| Watershed similarity coefficient | 0.179 | 0.038 | 0.246 |

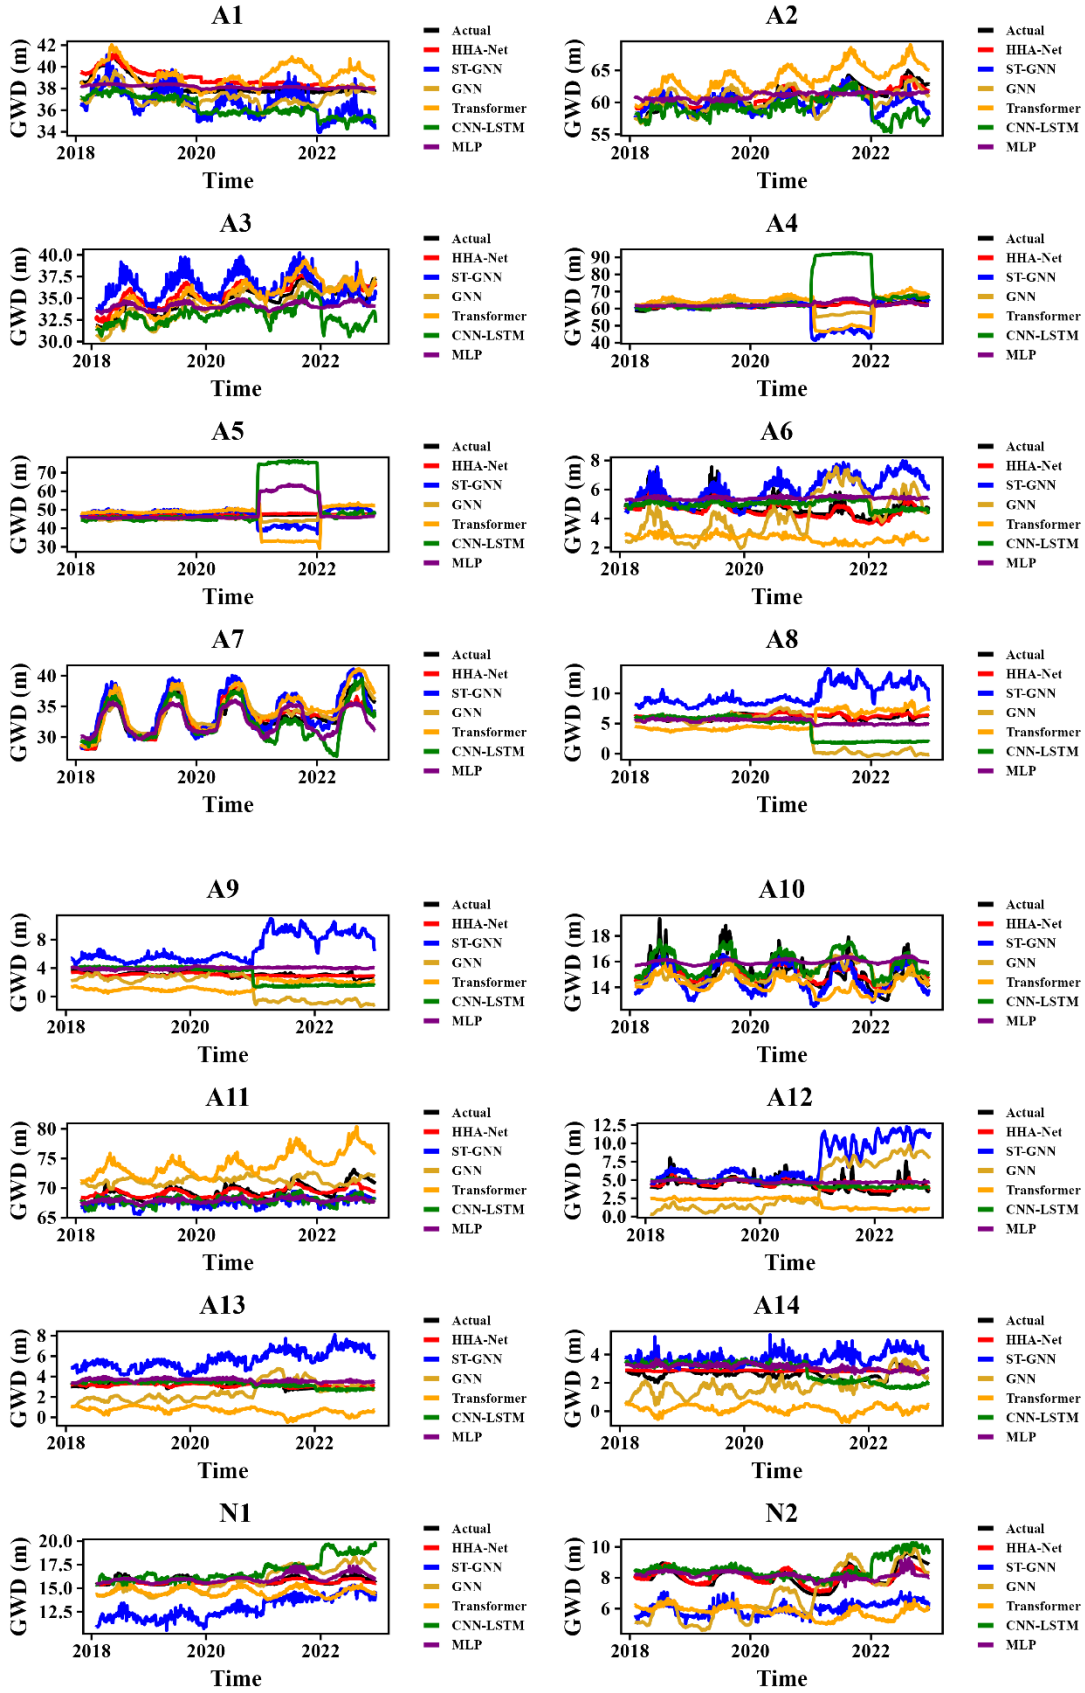

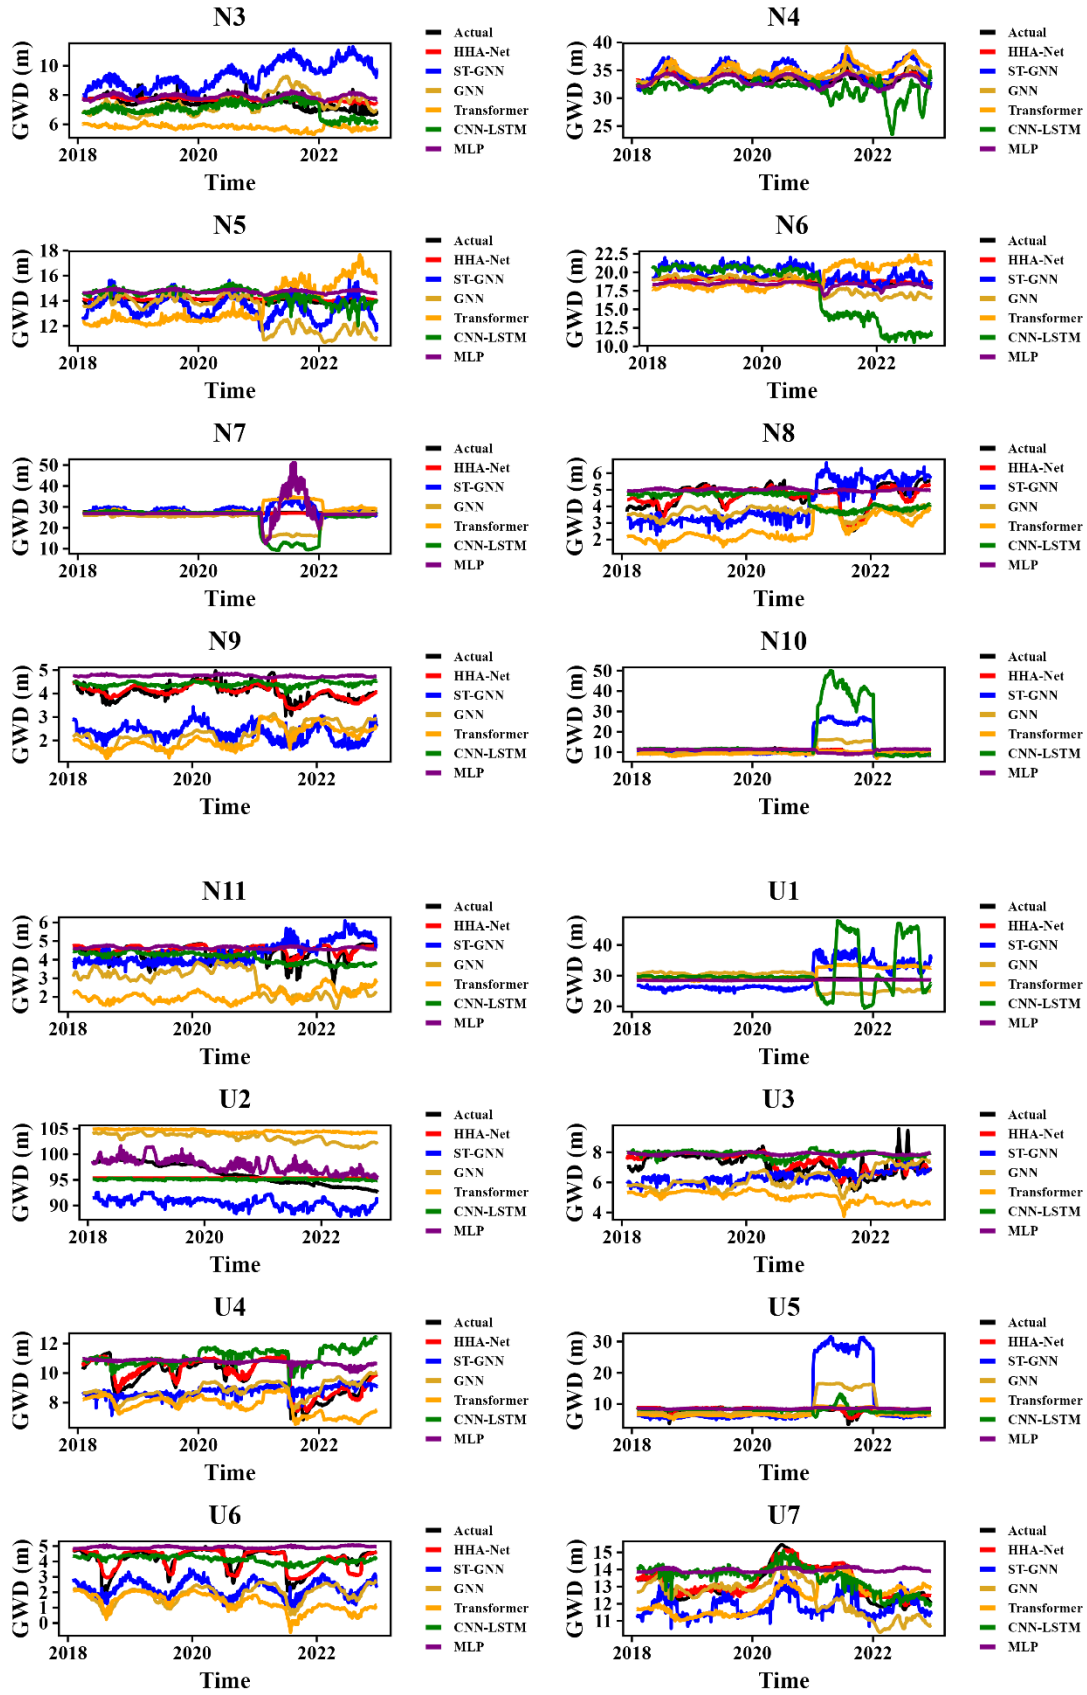

Figure S1. Comparison of 14-step GWD prediction performance across agricultural,

natural, and urban sites in YTMR.

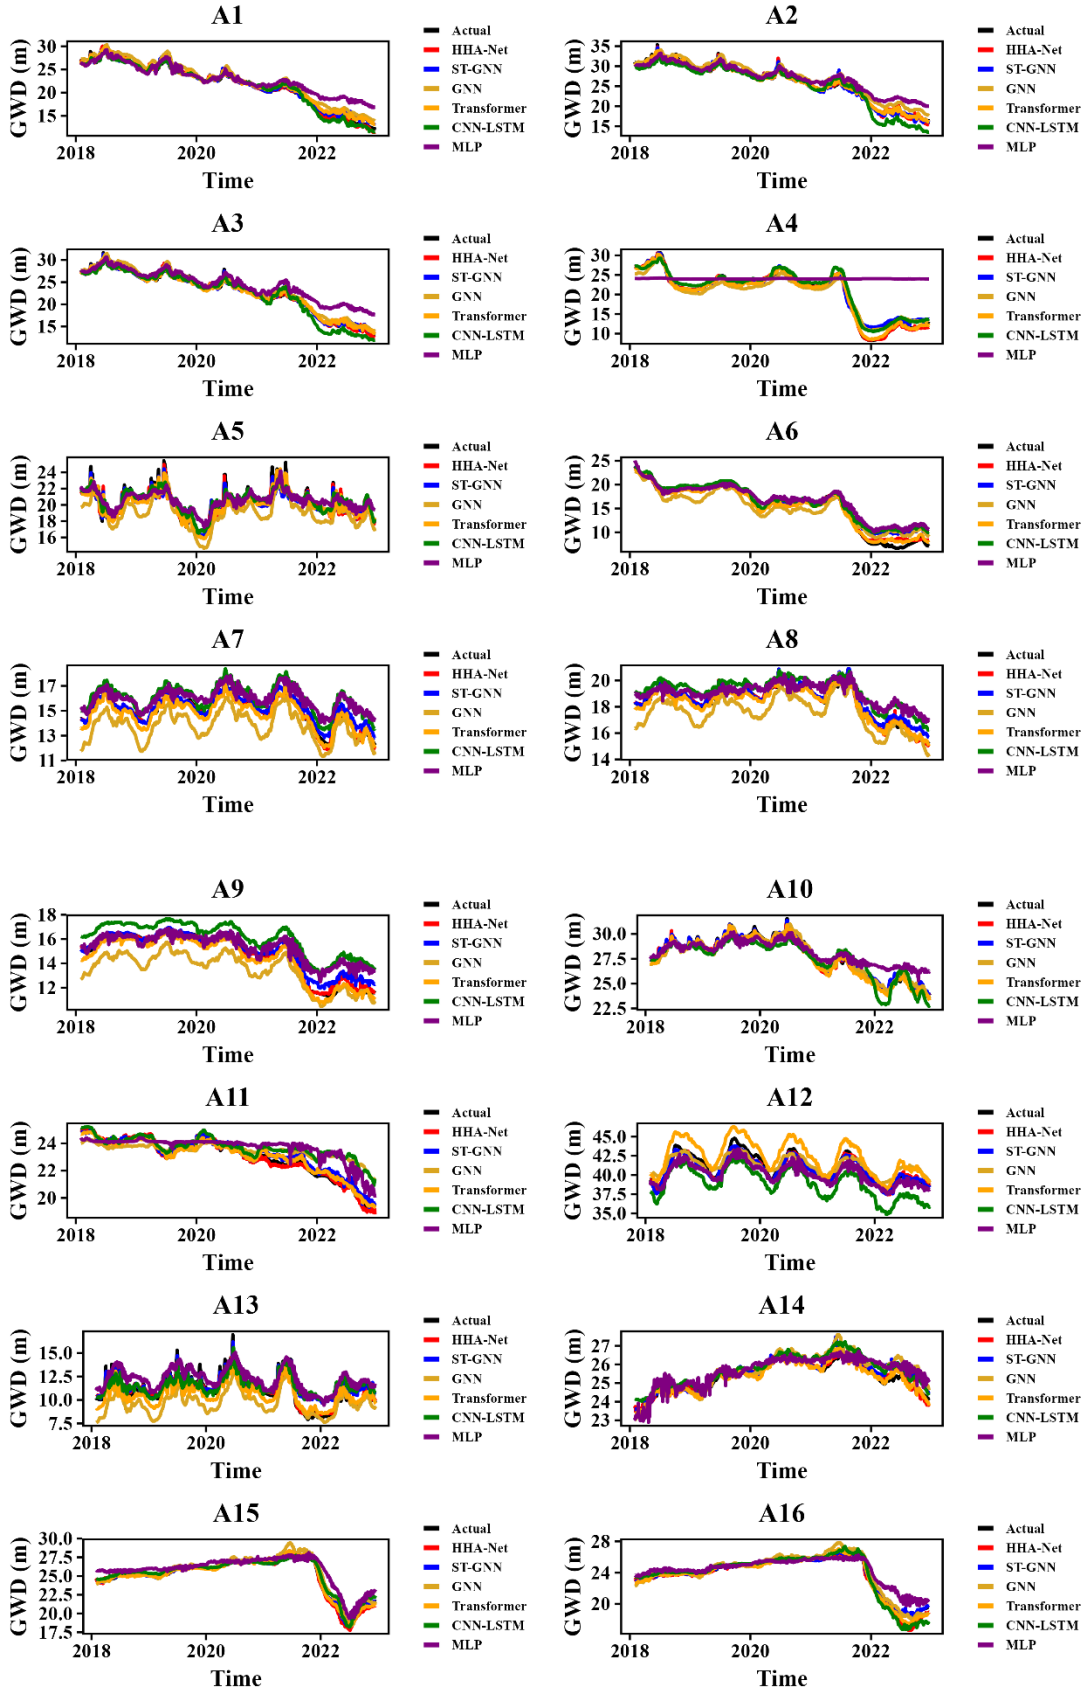

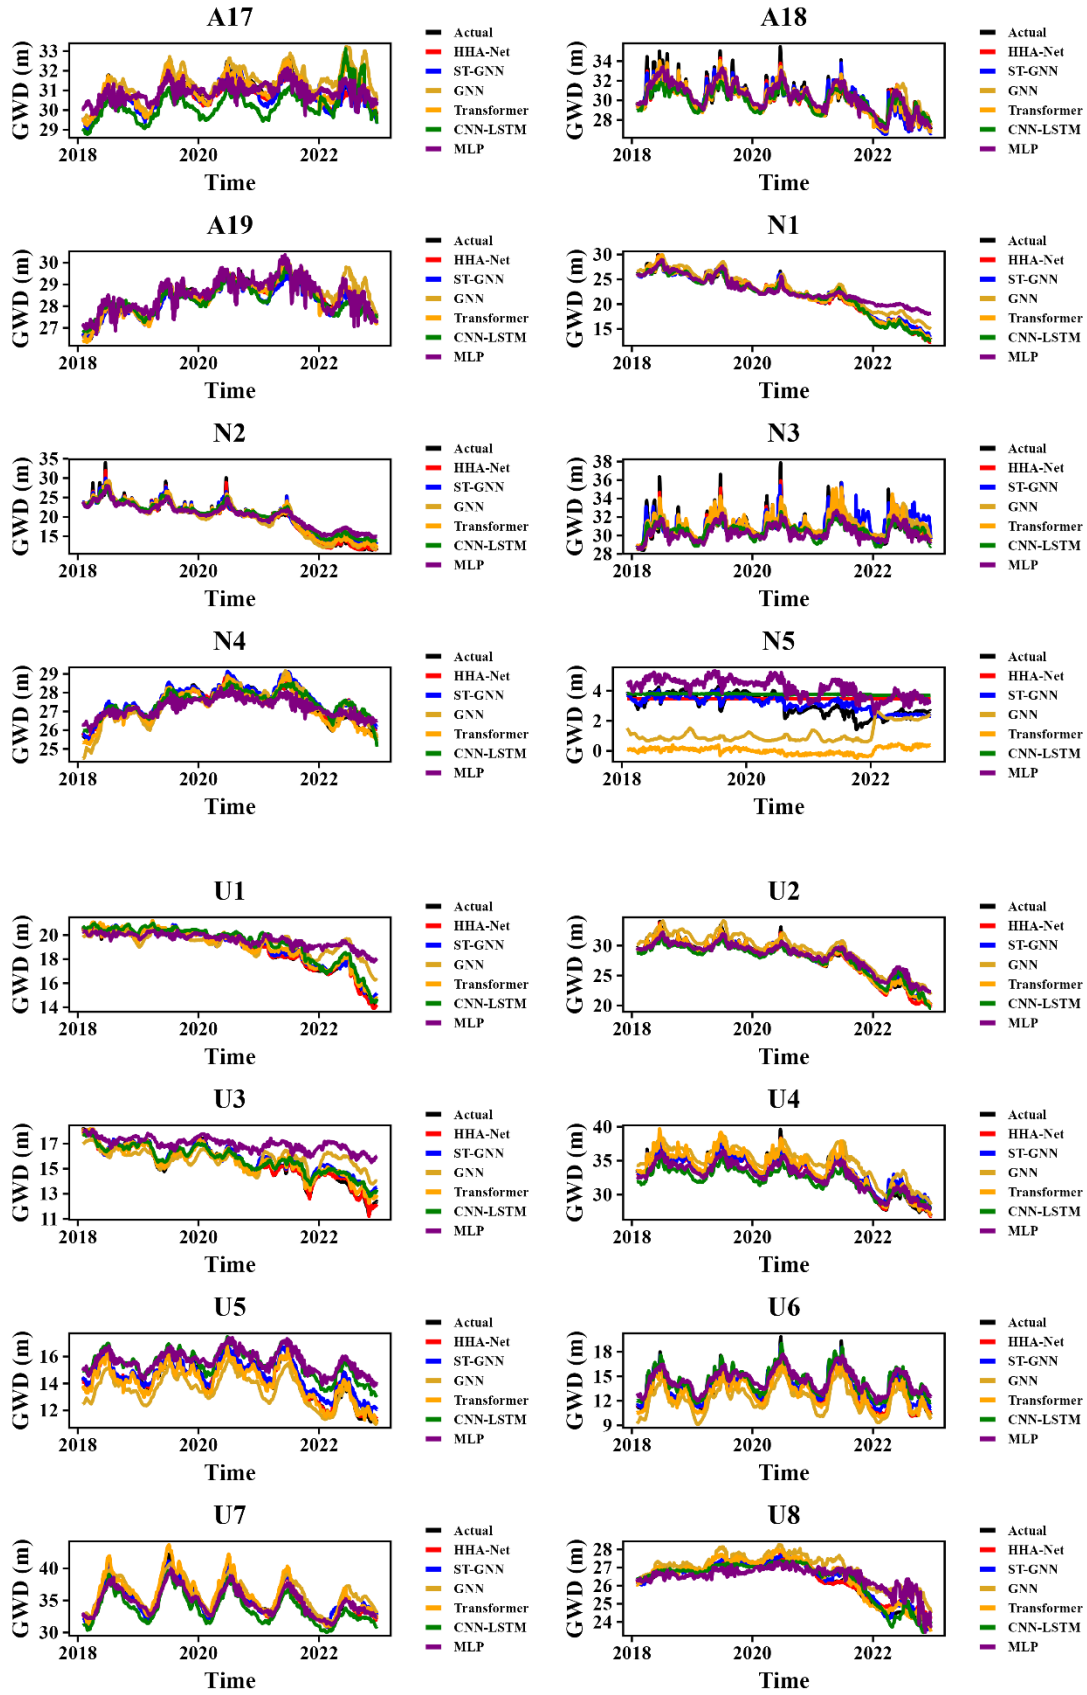

Figure S2. Comparison of 14-step GWD prediction performance across agricultural, agricultural, and urban sites.

natural, and urban sites in NCP.

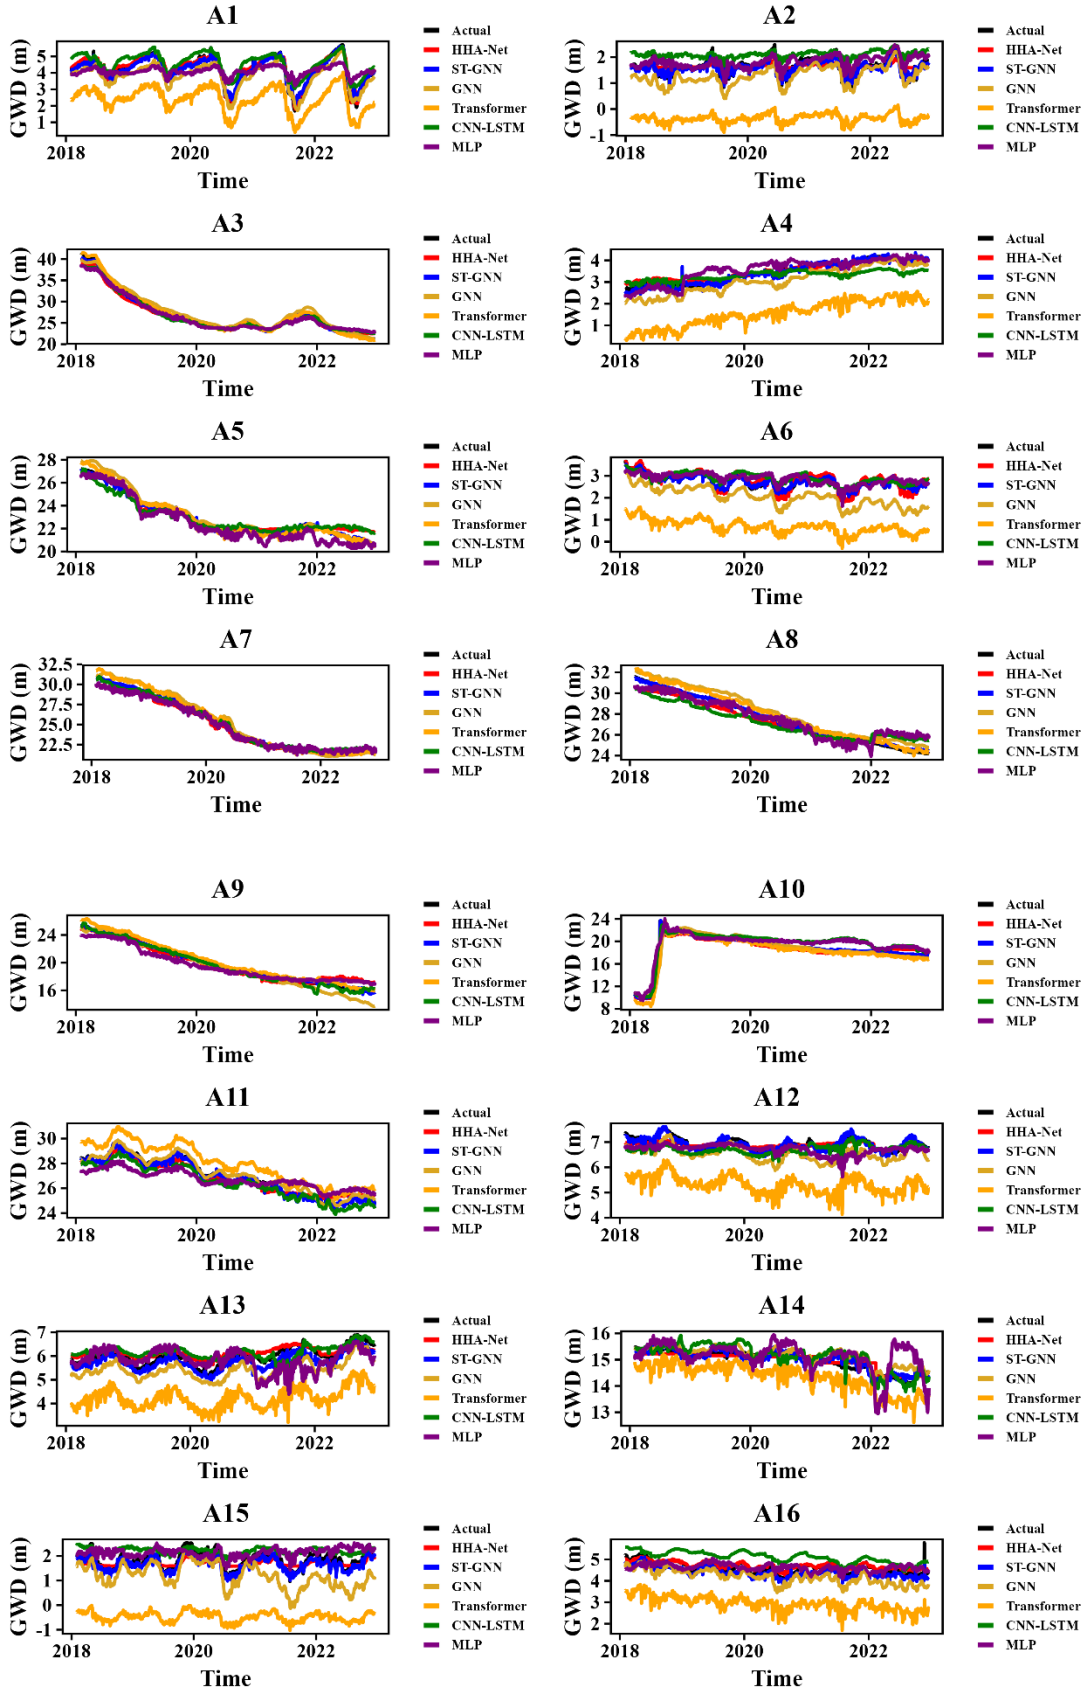

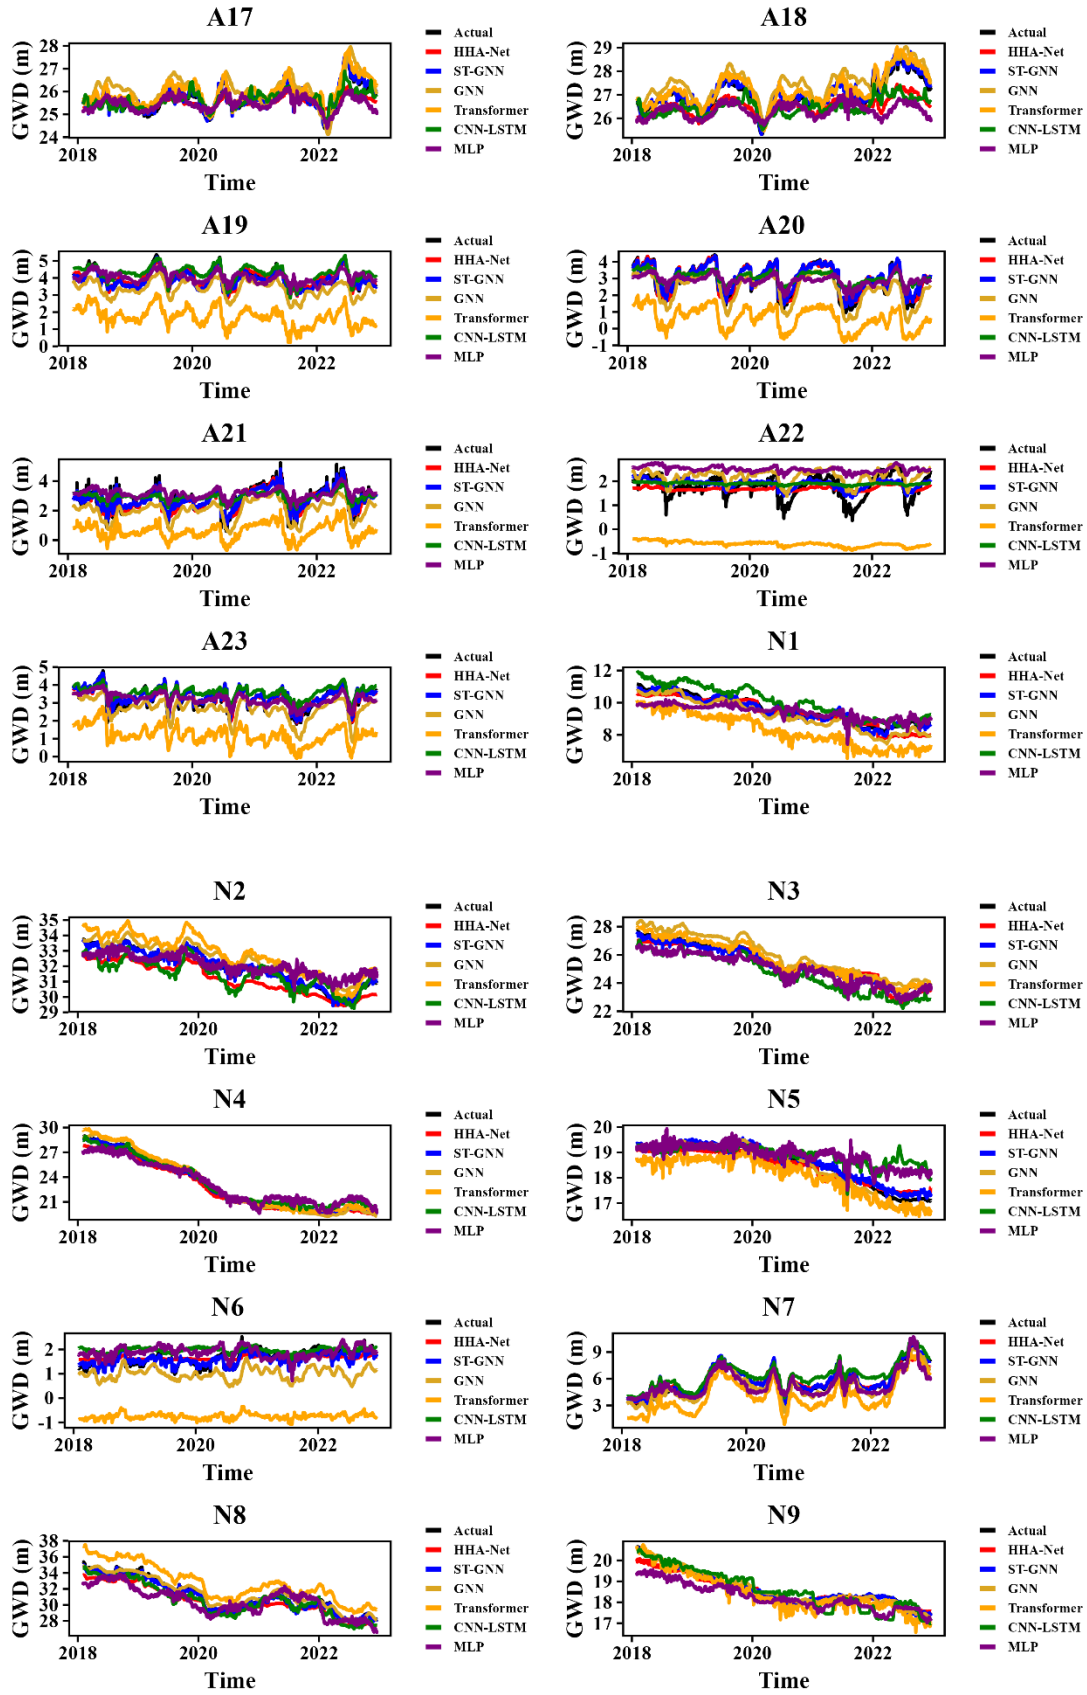

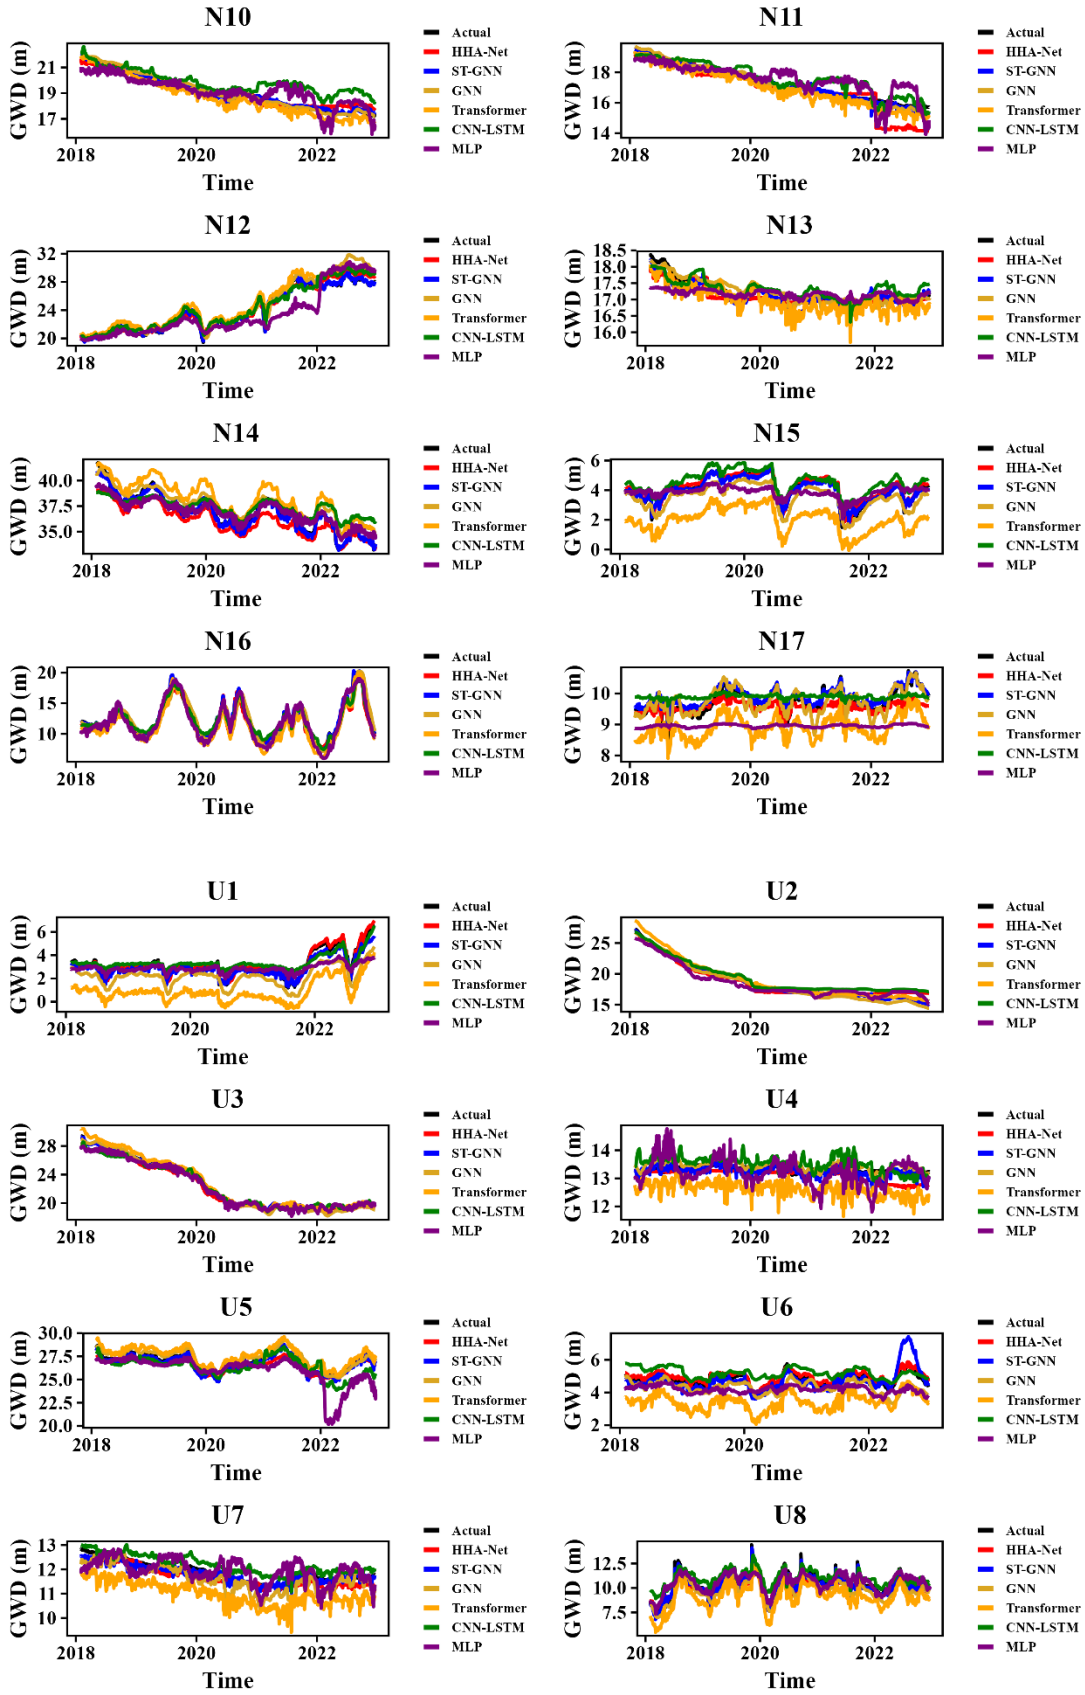

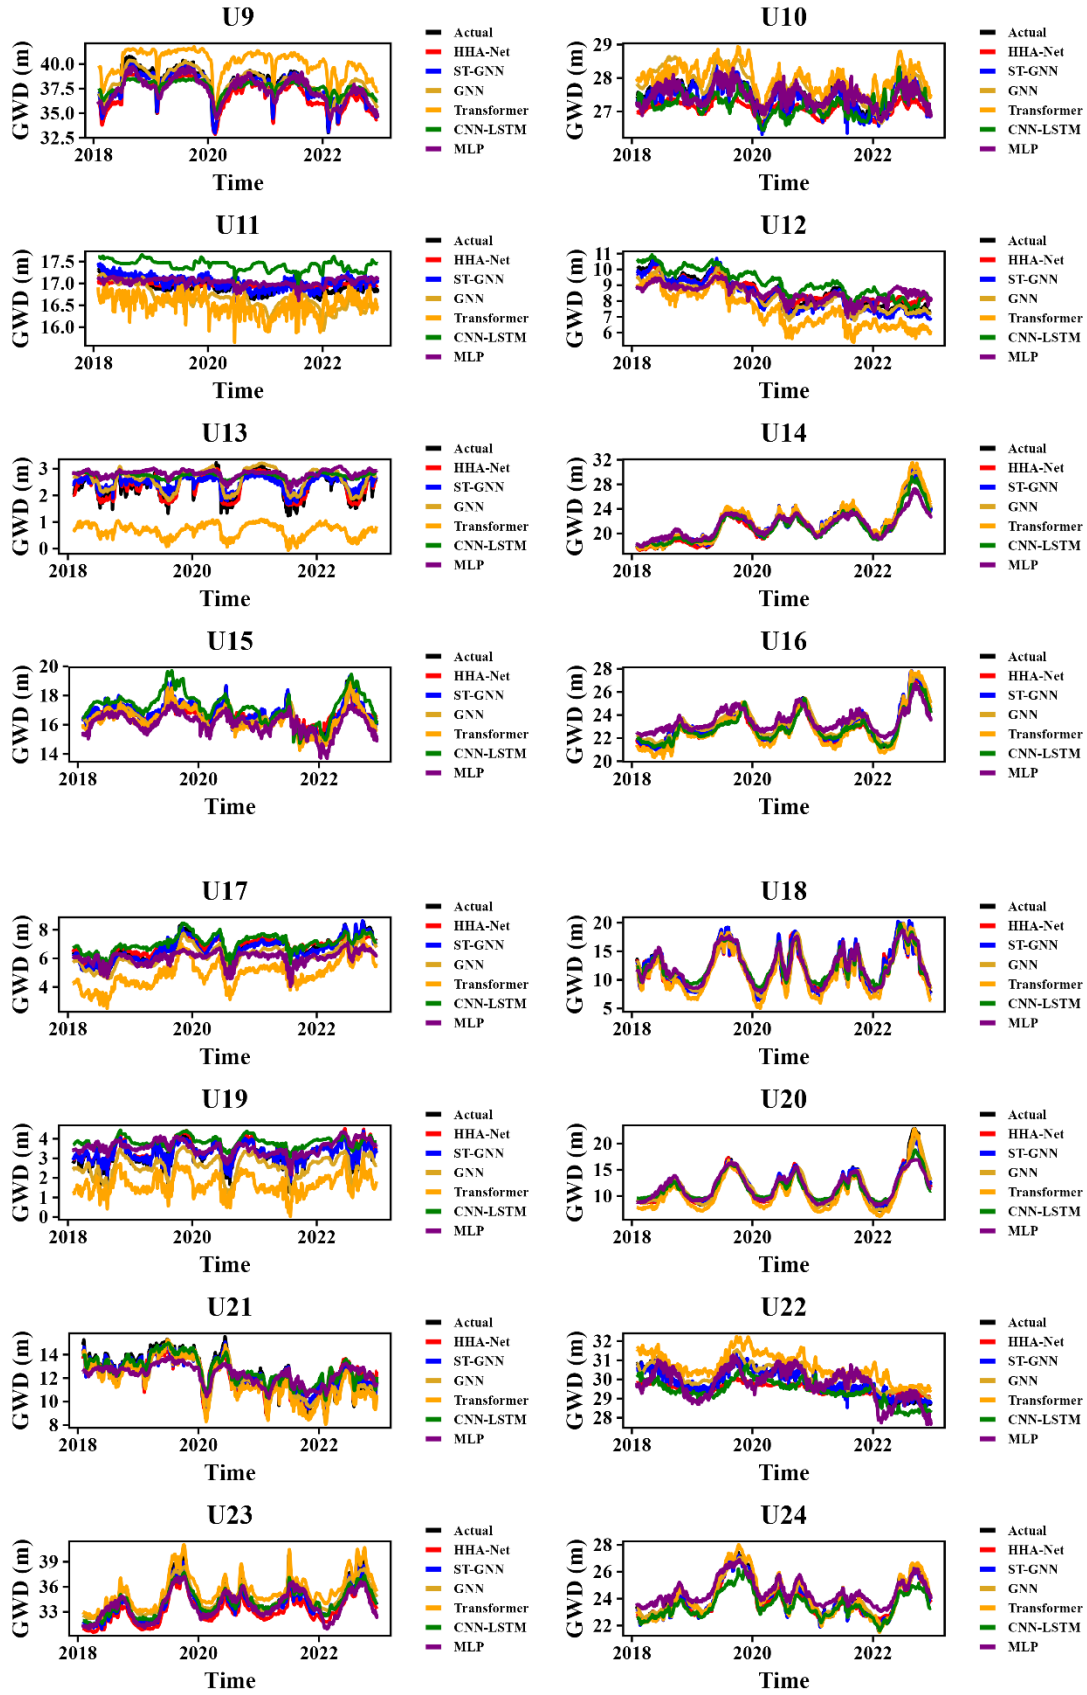

Figure S3. Comparison of 14-step GWD performance across agricultural, natural, and

urban sites in NJP.

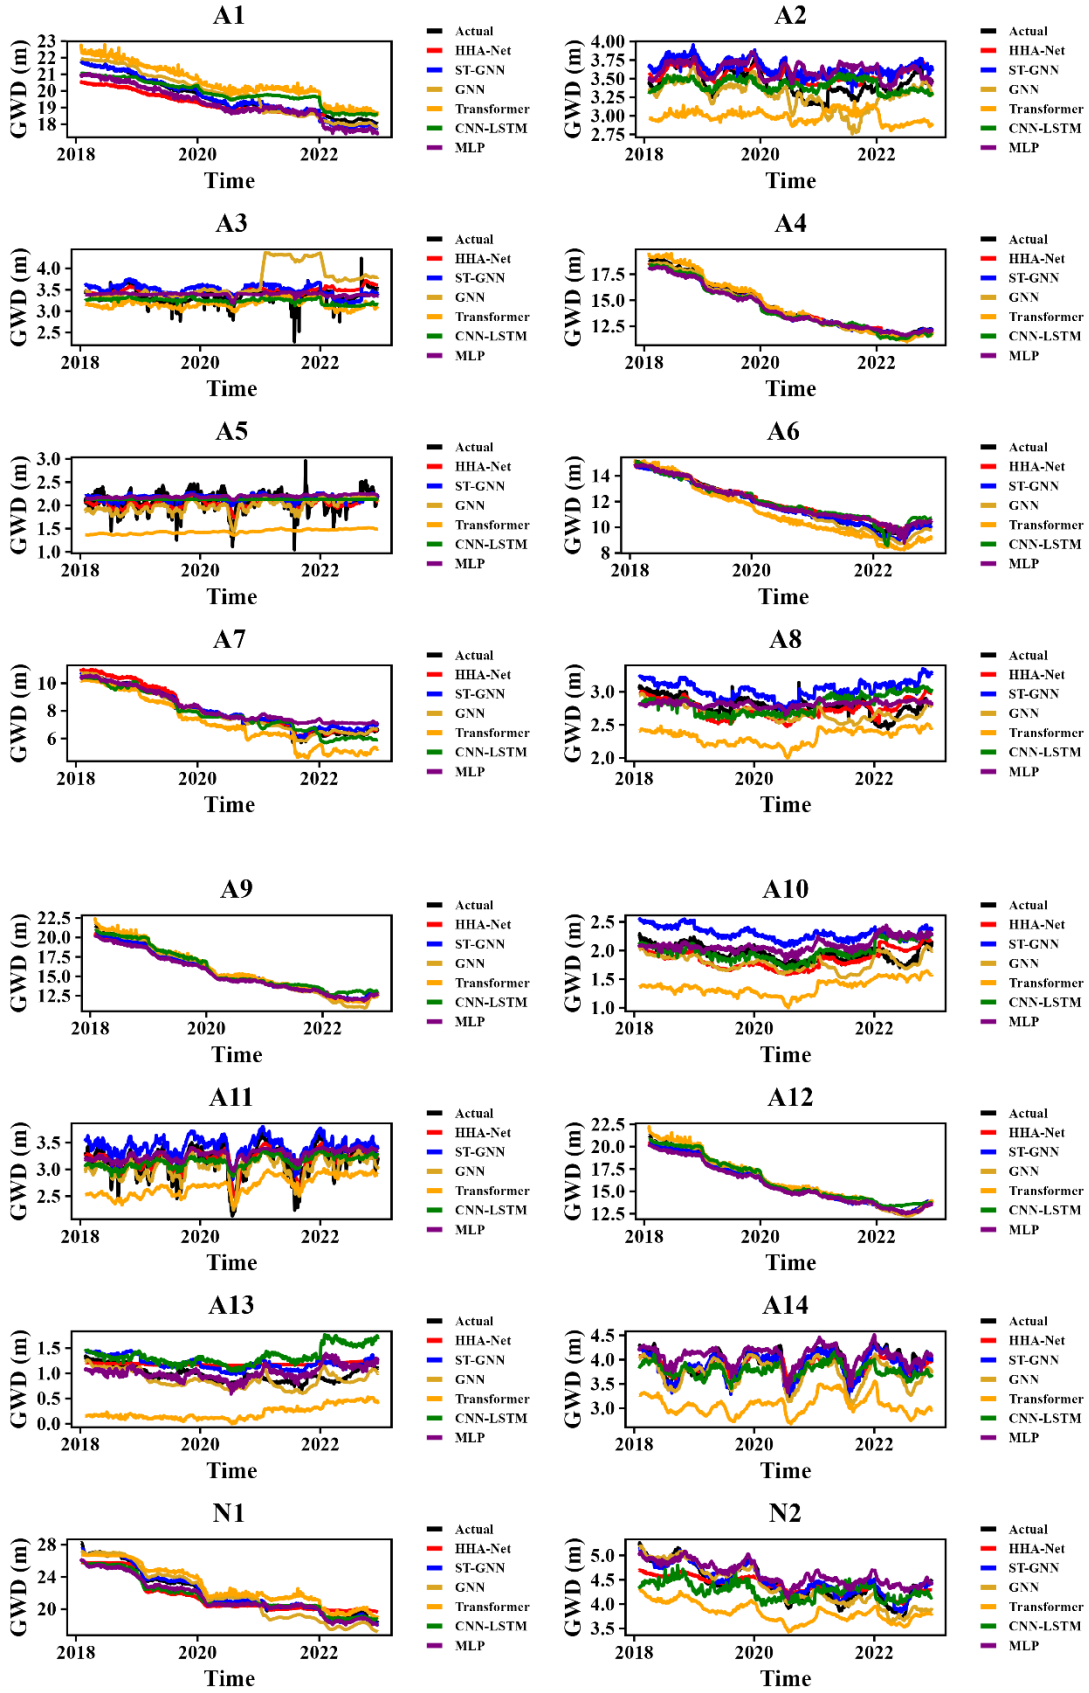

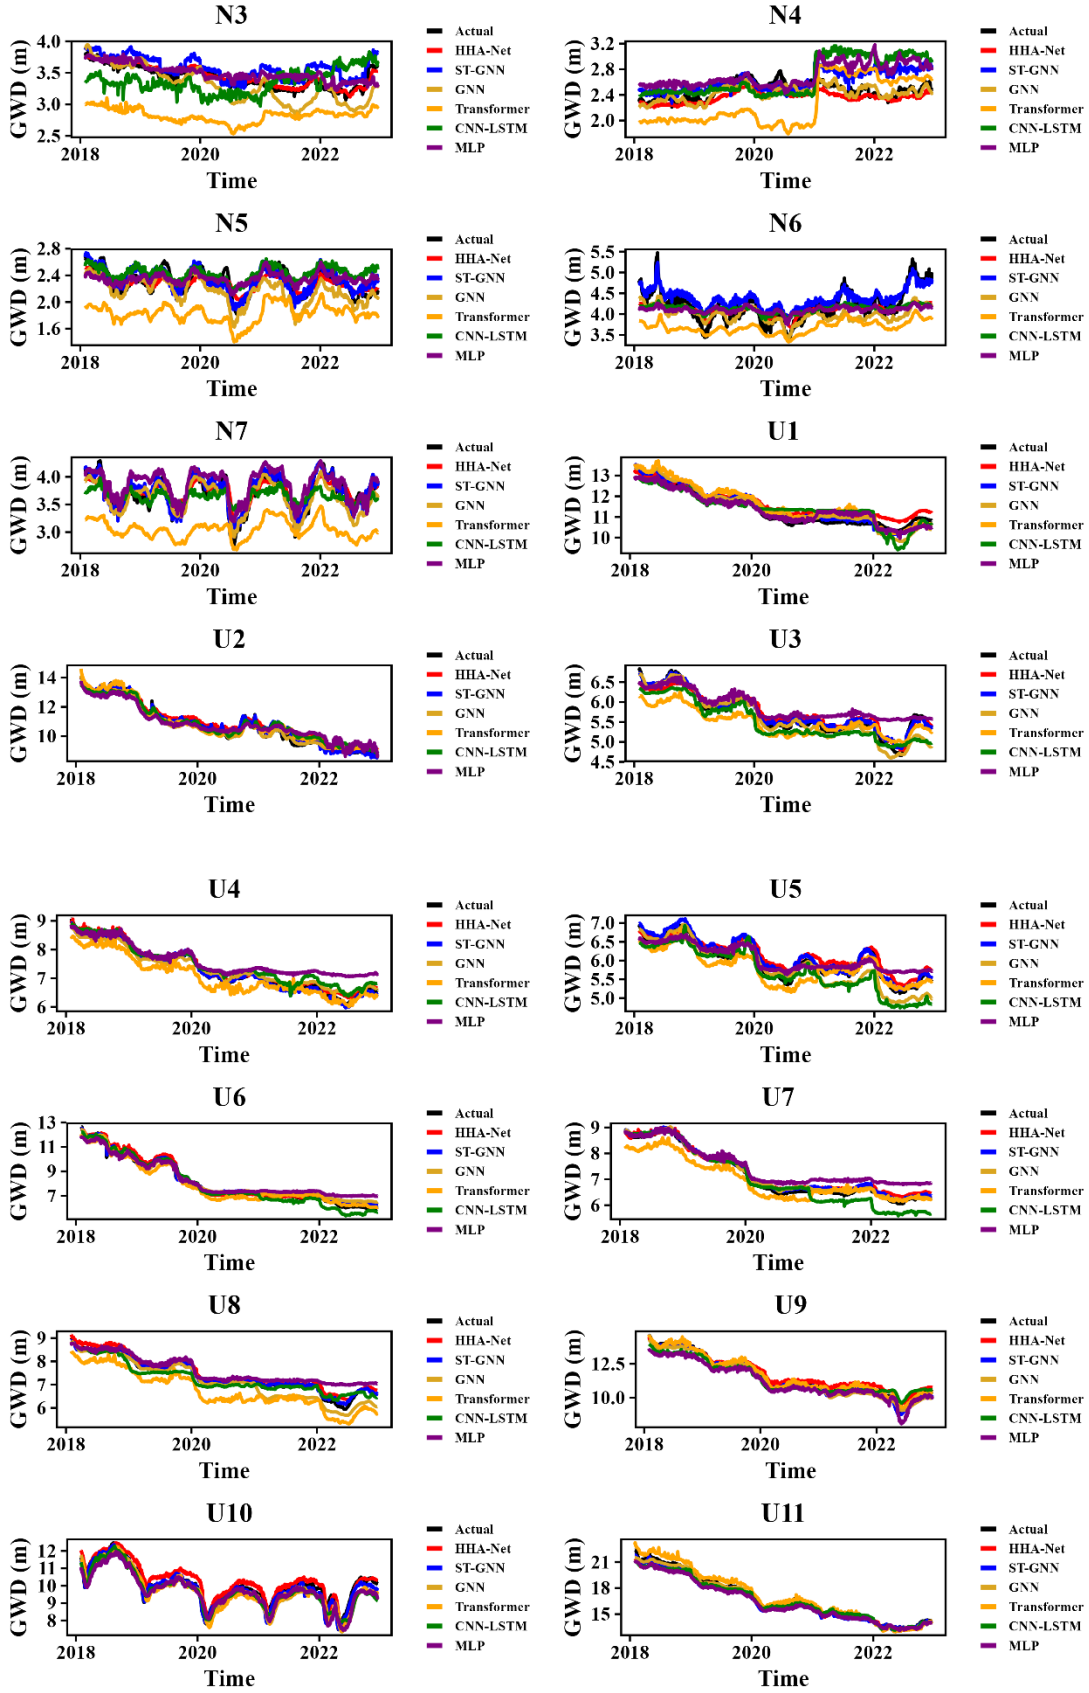

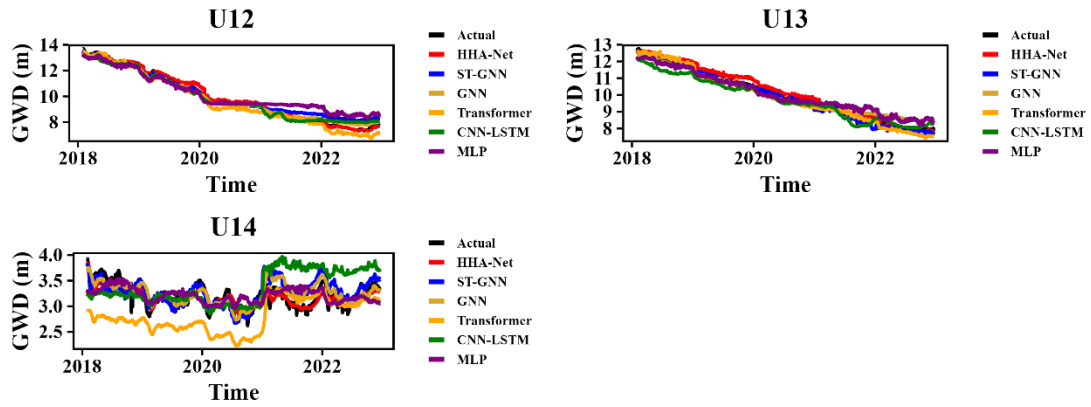

**Figure S4.** Comparison of 14-step GWD performance across agricultural, natural, and urban sites in LYRP.

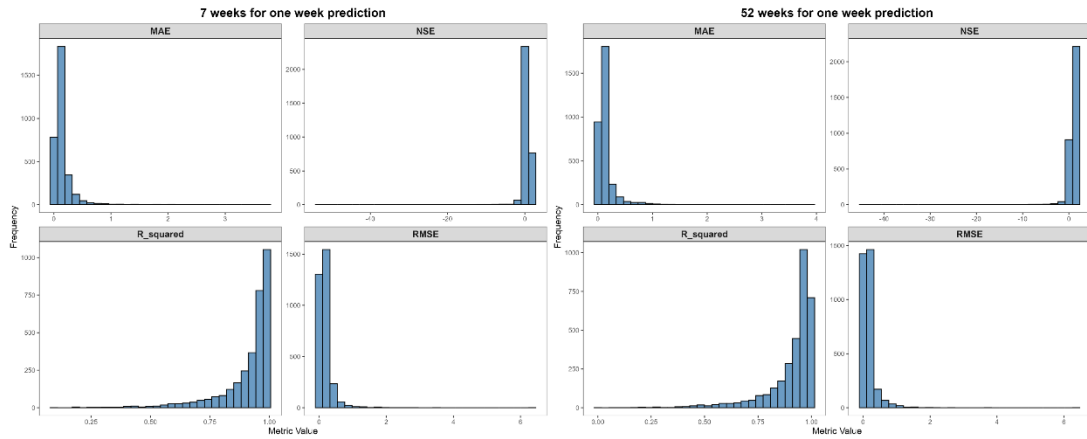

**Figure S5.** Distribution of prediction metrics from HHA-Net on the public GEMS-GER dataset.

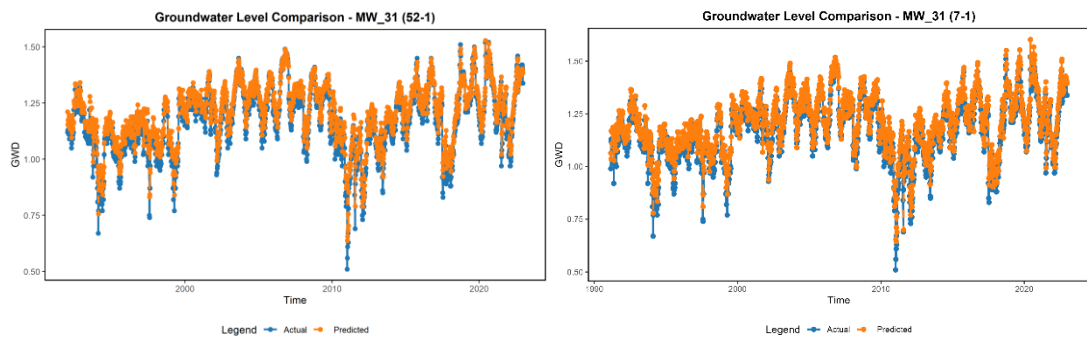

**Figure S6.** An example of scatter plots comparing predicted (52 weeks for 1 week prediction and 7 weeks for 1 week prediction) and observed GWD from the public GEMS-GER dataset.

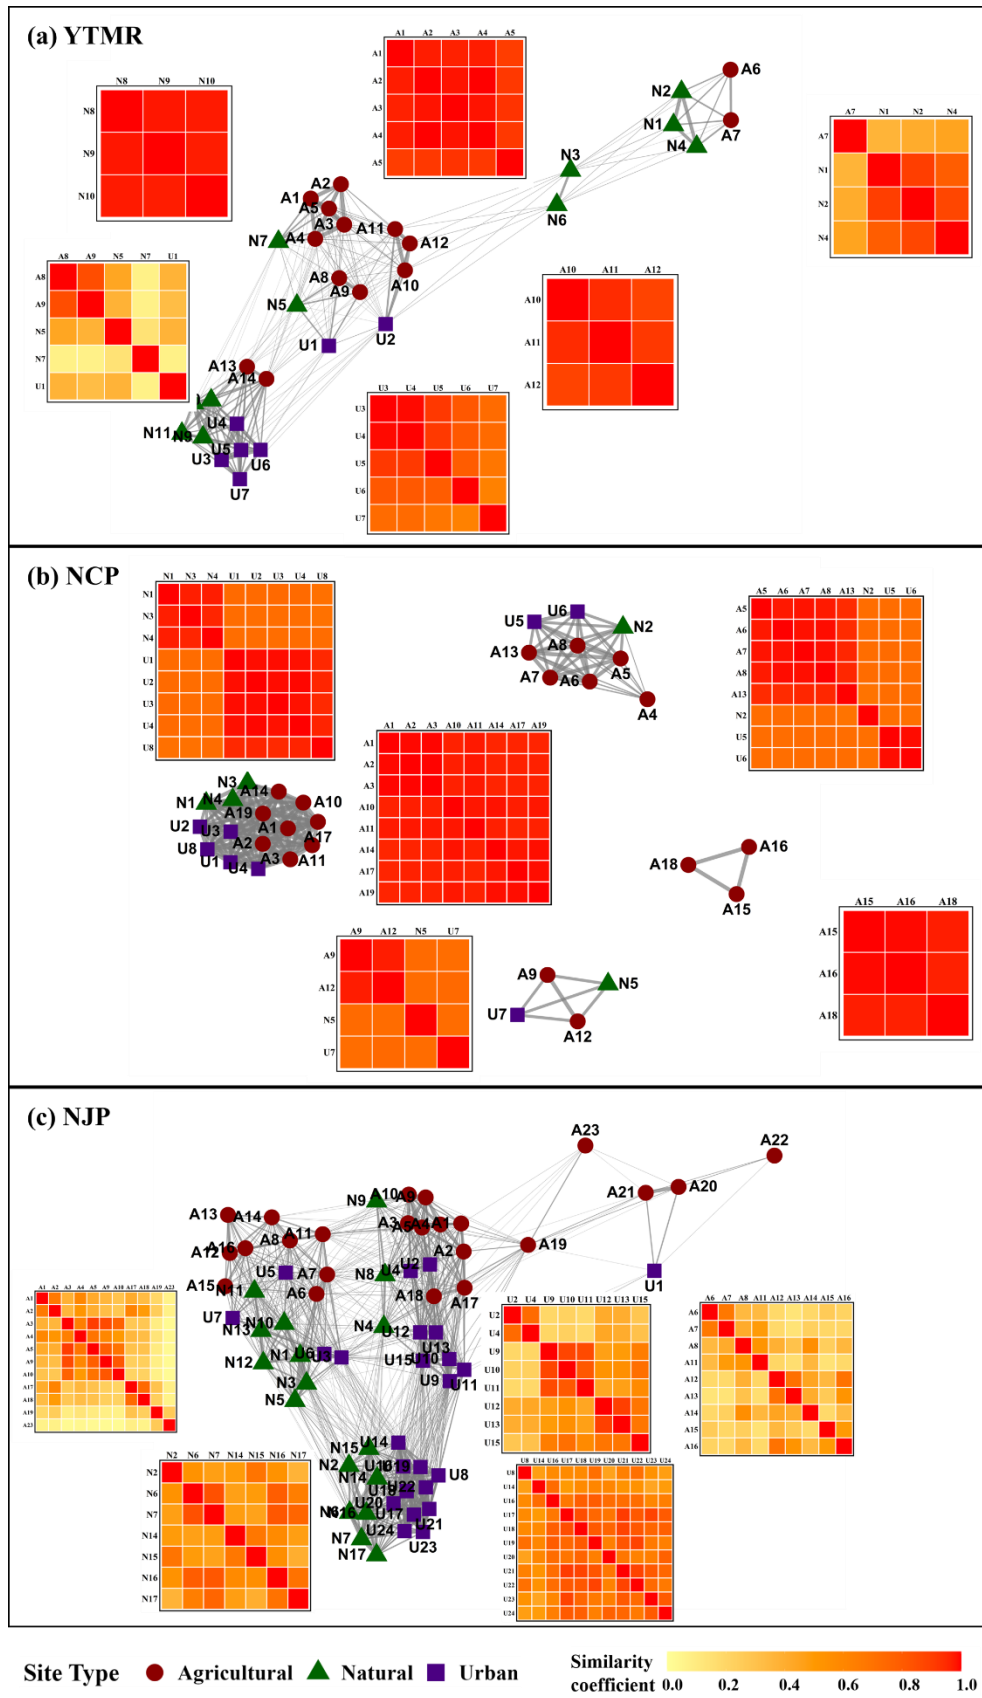

Figure S7. Spatial similarity networks for the three study regions.
