# Supplementary material
Source: Copernicus journal article supplement (doi:10.5194/egusphere-2026-2379)
Supplement: Supplementary file [file egusphere-2026-2379-AC1-supplement.pdf]

**Table S6.** Performance comparison of the HHA-Net and baseline models (CNN and LSTM) on the benchmark dataset GEMS-GER (test dataset).

|         | MAE          |              | RMSE         |              | NSE          |              | R <sup>2</sup> |              |
|---------|--------------|--------------|--------------|--------------|--------------|--------------|----------------|--------------|
|         | Mean         | Median       | Mean         | Median       | Mean         | Median       | Mean           | Median       |
| CNN     | 0.290        | 0.134        | 0.329        | 0.167        | -2.299       | 0.763        | 0.834          | 0.908        |
| LSTM    | 0.235        | 0.110        | 0.268        | 0.138        | -1.806       | 0.826        | 0.877          | 0.941        |
| HHA-Net | <b>0.150</b> | <b>0.096</b> | <b>0.186</b> | <b>0.122</b> | <b>0.348</b> | <b>0.863</b> | <b>0.901</b>   | <b>0.954</b> |
